# Supplementary material for: A polymer/solvent synergetic effect to improve the solubility of modified multi-walled carbon nanotubes
Source: Royal Society of Chemistry journal article supplement (doi:10.1039/c2jm16113c), 2012-01-01
Supplement: c2jm16113c.pdf [file c2jm16113c.pdf]

## **A Polymer/Solvent Synergetic Effect to Improve the Solubility of Modified Multi-Walled Carbon Nanotubes.**

Horacio J. Salavagione\*, Gerardo Martínez, Carlos Marco

After esterification of carbon nanotubes with 1-octadecylalcohol (ODA), the FTIR spectrum of the product (eMWNTs) show bands corresponding to the modifier (2921  $\text{cm}^{-1}$  and 2855  $\text{cm}^{-1}$  C-H stretch modes of the alkyl chain; 1731  $\text{cm}^{-1}$  C=O stretch of the ester or remaining carboxylic acid; 1450  $\text{cm}^{-1}$  C-H bend of the alkyl chain; 1155  $\text{cm}^{-1}$  C-O stretch of the ester group), proving the success of the reaction (Figure S1).

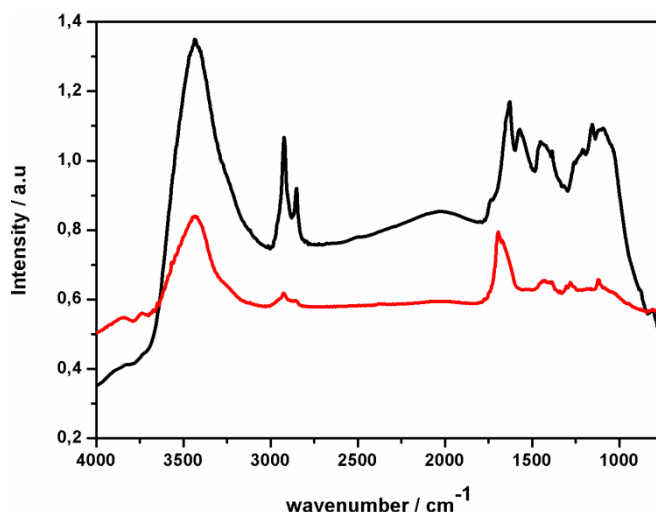

**Figure S1.** FTIR of the ozonized MWNTs before (red line) and after esterification with 1-octadecylalcohol

Similarly the analysis of the evolving gases during TGA measurements also proves the presence of alkyl chains attached to the nanotube surface. For the first process in the TGA curve (around 300  $^{\circ}\text{C}$ ) the evolution of compounds with different  $m/z$  is observed (for clarity we have selected only some representative  $m/z$ ). The fragments of mass 70, 74, 78, 79, 81, 82, 97, and 100 certainly correspond to species with formula  $\text{C}_x\text{H}_y\text{O}_z$ , which will undoubtedly come from the fragmentation of the side alkyl chains.

Here it is important to remark two aspects: i) only channels detecting higher molecular weight species were used being reason why no signal of  $\text{CO}_2$  and  $\text{H}_2\text{O}$  is observed during decomposition at high temperature and ii) the thermal fragmentation is different to the

ionization in typical mass spectrometry; thus a countless number of fragments having different mass are detected.

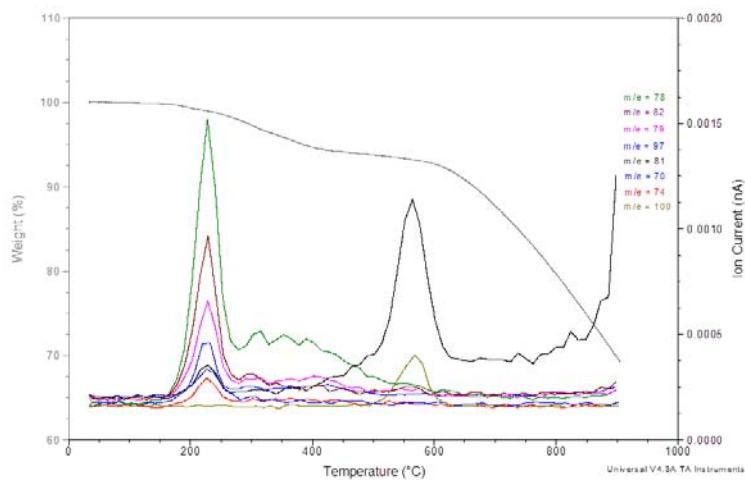

**Figure S2.** Thermogravimetric (TG) curves of eMWNTs superimposed with the evolution of gasses detected by mass spectroscopy

The variation of the storage modulus of PVC/eMWNTs nanocomposites as a function of the temperature is shown in Figure S3. The results suggest that a critical concentration has to be achieved to (around 5 wt. %) to significantly increase the storage modulus.

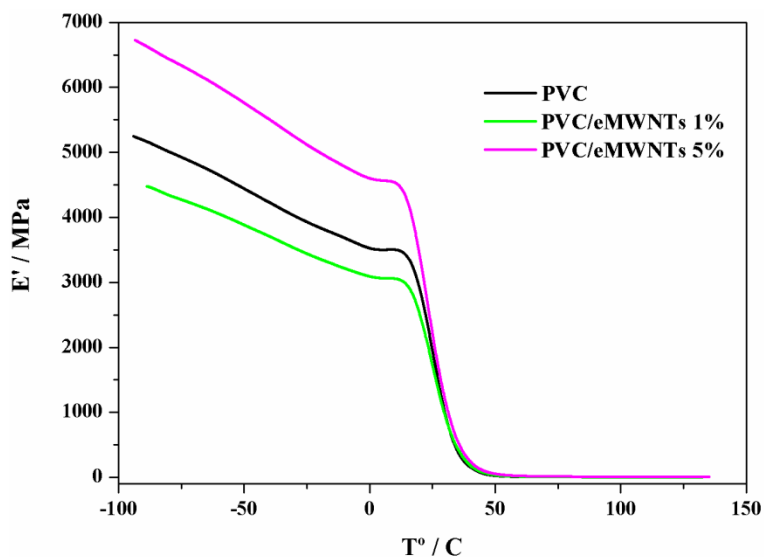

**Figure S3.** Variation of storage modulus ( $E'$ ) with the temperature in PVC and its nanocomposites with eMWNTs.
